# Supplementary material for: “Click” labeling strategy for M(CO)3 (M = Re, 99mTc) prostate cancer targeted Flutamide agents
Source: Royal Society of Chemistry journal article supplement (doi:10.1039/b921413e), 2010-01-01
Supplement: b921413e.pdf [file b921413e.pdf]

Electronic Supplementary Information for Dalton Transactions

This journal is © The Royal Society of Chemistry 2010

**“Click” Labeling Strategy for  $M(\text{CO})_3$  ( $M = \text{Re}, {}^{99\text{m}}\text{Tc}$ ) Prostate Cancer Targeted Flutamide Agents**

**Adam L. Moore<sup>a</sup>, Dejan-Krešimir Bučar<sup>b</sup>, Leonard R. MacGillivray<sup>b</sup>, and Paul D. Benny<sup>\*a</sup>**

<sup>a</sup>*Department of Chemistry, Washington State University, PO Box 644630, Pullman, WA 99164, USA.*

<sup>b</sup>*Department of Chemistry, University of Iowa, Iowa City, IA 52242-1294, USA*

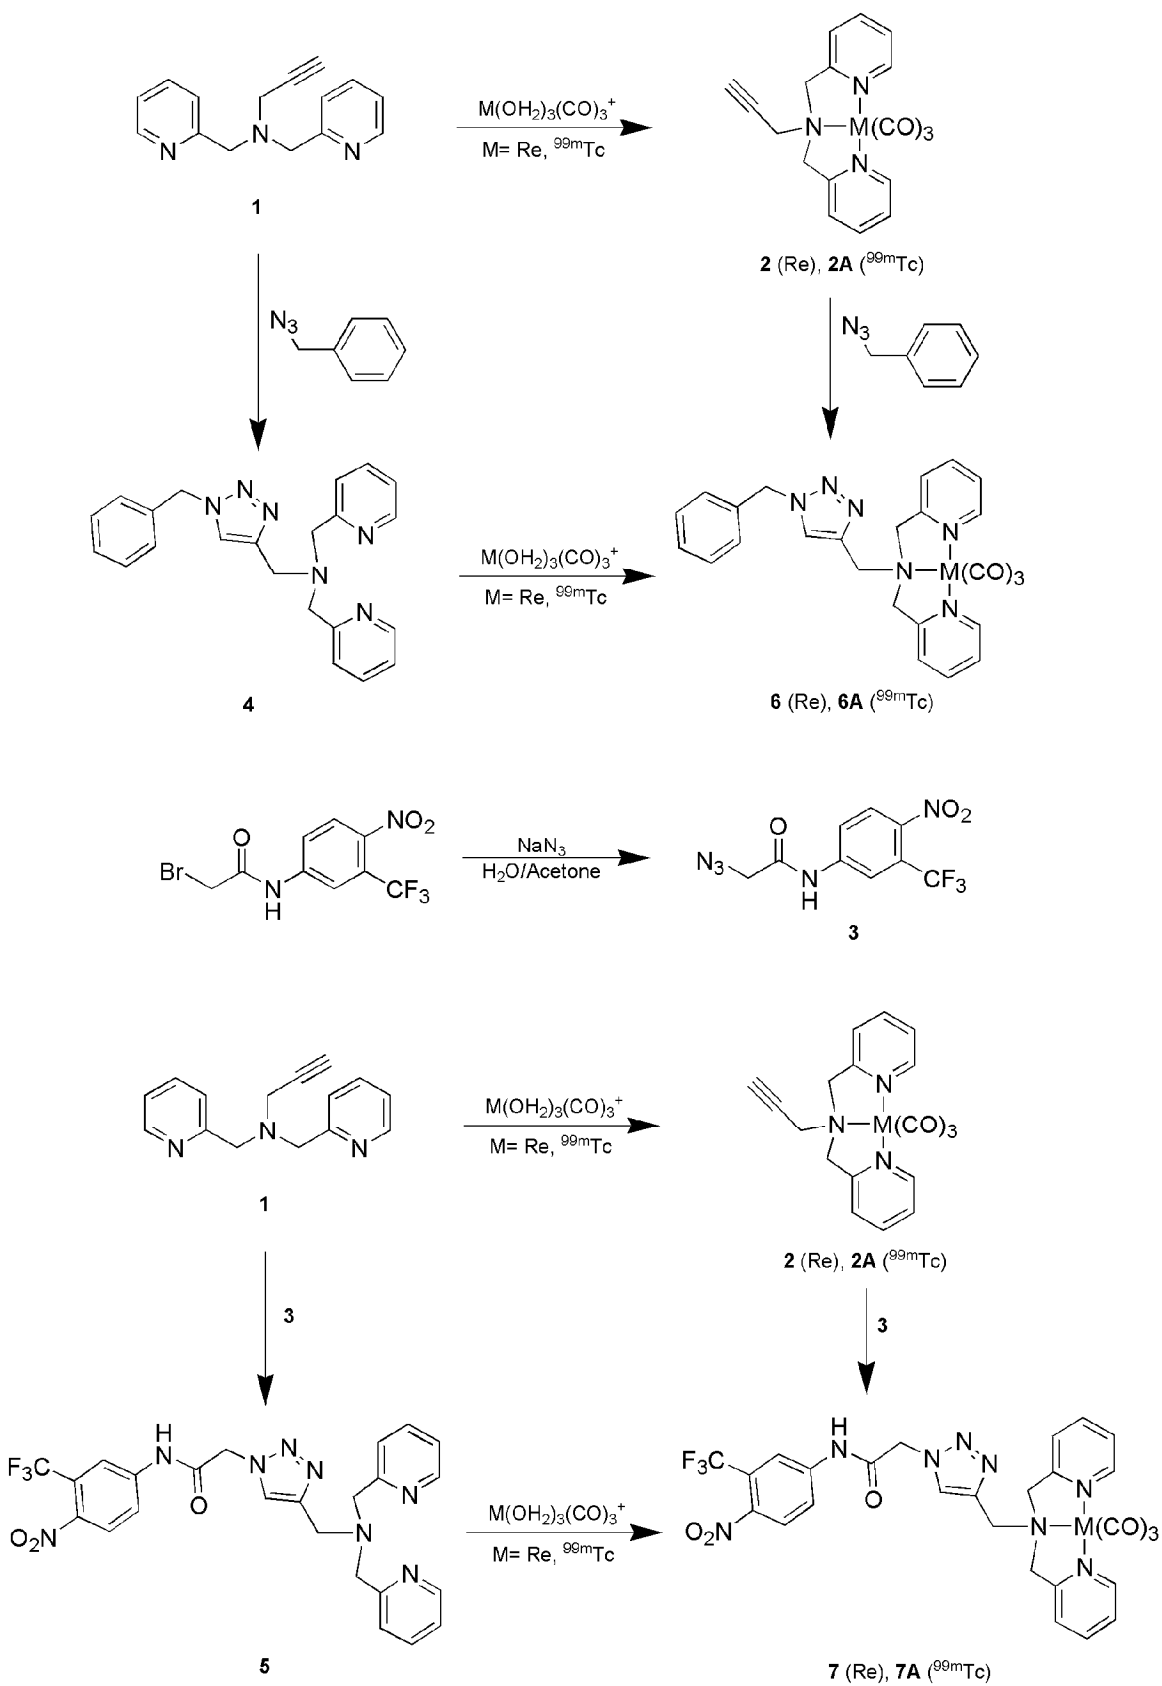

## Experimental

All reagents and organic solvents of reagent grade or better were used as purchased from Aldrich, Acros, or Fluka without further purification. Rhenium starting materials  $[\text{Re}(\text{CO})_5][\text{Br}]$ , and *fac*- $[\text{Re}(\text{CO})_3(\text{H}_2\text{O})_3][\text{SO}_3\text{CF}_3]$ , were prepared by literature methods from  $\text{Re}_2(\text{CO})_{10}$  purchased from Strem.<sup>1</sup> The preparations of *N,N*-bis(pyridine-2-ylmethyl)prop-2-yn-1-amine, **(1)** and 1-(1-benzyl-1*H*-1,2,3-triazol-4-yl)-*N,N*-bis(pyridine-2-ylmethyl)methanamine **(4)** were prepared as previously reported.<sup>2</sup> UV-Vis spectra were obtained using a Varian Carry 50 spectrophotometer (1 cm path-length). <sup>1</sup>H and <sup>13</sup>C NMR spectra were recorded on a Varian 300 MHz instrument at 25 °C in deuterated methanol. Elemental analyses were performed by Quantitative Technologies, Inc., NJ. Separation and identification of compounds were conducted on a Perkin Elmer Series 200 High Pressure Liquid Chromatograph (HPLC) equipped with a UV/VIS Series 200 detector and a Radiomatic 610TR detector. Utilizing an Agilent Zorbex 5µm particle and 30 cm SB-C18 column, the compounds were separated with a reverse phase gradient system beginning with 0.1% trifluoroacetic acid (TFA) aqueous eluent gradually shifting to methanol according to the following method, 0-3.0 min (100% TFA), 3.0-9.0 min (75% TFA, 25% MeOH), 9.0-20.0 min (25% to 100% MeOH linear gradient), 20.0-25.0 min (100% MeOH) at a flow rate of 1.0 mL/min or 5.0 mL/min for separation. FT-IR spectra were obtained on a Thermo Nicolet 6700 FT-IR with an ATR cell and analyzed with OMNIC 7.1a software. Mass spectra data were collected using a Q3 scans on an API4000 triple quadrupole (Applied Biosystems). Sample concentrations of ~0.1 µg/µL in methanol were infused at 10 µL/min, with orifice heating on, declustering potential 20 V, and entrance potential 10 V.

**[*fac*-Re(CO)<sub>3</sub>(1)]OTf, 2.**

To a methanolic solution of **1** (277 mg, 1.16 mmol), in a sealable 25 cm<sup>3</sup> vial, was added 0.1 M [Re(CO)<sub>3</sub>(OH<sub>2</sub>)<sub>3</sub>]OTf<sub>(aq)</sub> (11.6 mL, 1.16 mmol). The vial was sealed, and stirred at room temperature for 12 hr. which produced a light brown precipitate that was collected by vacuum filtration. Recrystallization of **2** with CH<sub>3</sub>OH/Et<sub>2</sub>O yielded clean product. X-ray quality crystals were grown by slow diffusion of CH<sub>3</sub>OH/Et<sub>2</sub>O (280 mg, 37%).  $\delta_{\text{H}}$ (299.8 MHz, CD<sub>3</sub>OD) 8.52 (2 H, d), 7.60 (2 H, t), 7.48 (2 H, m), 7.11 (2 H, m), 3.89 (4 H, s), 3.39 (2 H, d), 2.26 (1 H, t);  $\delta_{\text{C}}$ (75.5 MHz, CD<sub>3</sub>OD) 195.5, 195.0, 160.3, 152.1, 140.5, 125.8, 125.7, 68.1, 65.7, 57.9;  $\lambda_{\text{max}}$ (CH<sub>2</sub>Cl<sub>2</sub>)/nm: 261 ( $\epsilon/\text{dm}^3 \text{ mol}^{-1} \text{ cm}^{-1}$  24 000);  $\nu_{\text{max}}/\text{cm}^{-1}$ : 2360 (C≡C); 2030 and 1926 (CO); m/z 505.3 (M<sup>+</sup>, 100%), 503.3 (58), 506.3 (31); Found: C, 33.50; H, 2.29; N, 6.19. Calc. for C<sub>19</sub>H<sub>15</sub>N<sub>3</sub>O<sub>6</sub>ReSF<sub>3</sub>•OH<sub>2</sub>: C, 33.81; H, 2.54; N, 6.23.

**2-azido-*N*-(4-nitro-3-(trifluoromethyl)phenyl)acetamide, 3.**

The product was prepared under conditions developed for compounds in a previous report, (2-bromo-*N*-(4-nitro-3-(trifluoromethyl)phenyl)acetamide).<sup>3</sup> 2-bromo-*N*-(4-nitro-3-(trifluoromethyl)phenyl)acetamide (300 mg, 0.92 mmol) followed by the addition of NaN<sub>3</sub> (126 mg, 1.94 mmol) was added to a vigorously stirred acetone/water solution (4:1, 10 cm<sup>3</sup>/2.5). The solution was stirred for 3 hours at room temperature at which time complete conversion of the starting material into **3** was observed by thin layer chromatography (R<sub>f</sub> = 0.15 CH<sub>2</sub>Cl<sub>2</sub>/Hexane 3:1). The reaction mixture was dried under vacuum and the residue was redissolved in CH<sub>2</sub>Cl<sub>2</sub> and filtered. Purification was achieved by silica gel chromatography with (CH<sub>2</sub>Cl<sub>2</sub>:Hexane 3:1) (250.3 mg, 94.1%).

$\delta_{\text{H}}$ (299.8 MHz, CD<sub>3</sub>OD) 8.22 (1 H, s), 8.04 (2 H, s), 4.08 (2 H, s);  $\delta_{\text{C}}$ (75.5 MHz, CD<sub>3</sub>OD) 168.1, 143.0, 142.9, 127.0, 124.3 (dd,  $J_{\text{CF}}$  34), 122.6, 121.2, (dd,  $J_{\text{CF}}$  272), 118.1, (dd,  $J_{\text{CF}}$  6), 52.0;  $\lambda_{\text{max}}$ (CH<sub>2</sub>Cl<sub>2</sub>)/nm: 230 ( $\epsilon/\text{dm}^3 \text{ mol}^{-1} \text{ cm}^{-1}$  1 900), 285 (1 500);  $\nu_{\text{max}}/\text{cm}^{-1}$ : 1713 (CO); 2101 (N<sub>3</sub><sup>-</sup>); 3349 (NH);  $m/z$  235.6; Found: C, 37.47; H, 1.95; N, 24.00. Calc. for C<sub>9</sub>H<sub>6</sub>N<sub>5</sub>O<sub>3</sub>F<sub>3</sub>: C, 37.36; H, 2.09; N, 24.22.

**2-4-((bis(pyridine-2-ylmethyl)amino)methyl)-1H-1,2,3-triazol-1-yl)-N-(4-nitro-3-(trifluoromethyl)phenyl)acetamide, 5.**

A 25 cm<sup>3</sup> scintillation vial was charged with *N,N*-bis(pyridine-2-ylmethyl)prop-2-yn-1-amine, **1** (0.100 g, 0.420 mmol) and **3** (0.121 g, 0.420 mmol) and dissolved in CH<sub>3</sub>OH (4 cm<sup>3</sup>). To the mixture was added sodium ascorbate (0.166 g, 0.840 mmol) in water (2 cm<sup>3</sup>) followed by of Cu<sup>II</sup>(OAc)<sub>2</sub> (0.076 g, 0.420 mmol) in water (2 cm<sup>3</sup>). The solution was stirred at room temperature for 12 hrs. An additional 30 minutes of stirring was needed after the addition of excess EDTA. The pH was then raised to 11 through the addition of KOH pellets. The mixture was extracted 3 times with CH<sub>2</sub>Cl<sub>2</sub> (20 cm<sup>3</sup>). The organic portions were combined and dried over Na<sub>2</sub>SO<sub>4</sub>. The volume was reduced (ca. 5 cm<sup>3</sup>) and precipitated with Et<sub>2</sub>O to yield an off white precipitate which was collected by vacuum filtration (0.178 g, 81.0%).  $\delta_{\text{H}}$ (299.8 MHz, CD<sub>3</sub>OD) 8.87 (2 H, dd), 8.44 (1 H, s), 8.32 (1 H, m), 7.82-7.78 (4 H, m), 7.26 (4 H, m), 5.55 (2 H, s), 5.09 (2 H, s), 4.81 (4 H, dd,  $J_{\text{AB}}$  12);  $\delta_{\text{C}}$ (75.5 MHz, CD<sub>3</sub>OD) 216.3, 165.5, 144.2, 143.1, 142.9 (dd,  $J_{\text{CF}}$  1347), 142.8, 126.0, 124.5 (dd,  $J_{\text{CF}}$  36), 123.7, 123.3, 122.7, 122.6, 121.2, 117.9 (dd,  $J_{\text{CF}}$  6), 66.7, 59.1, 52.8;  $\lambda_{\text{max}}$ (CH<sub>2</sub>Cl<sub>2</sub>)/nm: 265 ( $\epsilon/\text{dm}^3 \text{ mol}^{-1} \text{ cm}^{-1}$  12 000), 235 (16 000);

$\nu_{\max}/\text{cm}^{-1}$ : 1710 (CO); 2100 ( $\text{N}_3^-$ );  $m/z$  448; Found: C, 53.96; H, 4.04; N, 20.57. Calc. for  $\text{C}_{24}\text{H}_{21}\text{N}_8\text{O}_3\text{F}_3 \cdot 0.5\text{OH}_2$ : C, 53.81; H, 4.14; N, 20.93.

**[*fac*-Re(CO)<sub>3</sub>(4)]OTf, 6.**

**Method A:** A 25 cm<sup>3</sup> scintillation vial was charged with  $[\text{Re}^{\text{I}}(\text{CO})_3(\mathbf{1})]^+$ , **2**, (0.050 g, 0.076 mmol), benzylazide (0.010 g, 0.076 mmol) and dissolved in *tert*-butyl alcohol (4 cm<sup>3</sup>). To the mixture was added sodium ascorbate (0.003 g, 0.0015 mmol) in water (2 cm<sup>3</sup>) followed by  $\text{Cu}^{\text{II}}(\text{OAc})_2$  (0.002 g, 0.0076 mmol) in water (2 cm<sup>3</sup>). This mixture was stirred at room temperature for 90 minutes. The mixture was neutralized and extracted 3 times with  $\text{CH}_2\text{Cl}_2$  (20 cm<sup>3</sup>). The organic portions were combined and dried over  $\text{Na}_2\text{SO}_4$  and the volume was reduced to ca. 5 cm<sup>3</sup>. The product was precipitated with  $\text{Et}_2\text{O}$  to yield a light brown precipitate which was collected by vacuum filtration. (41 mg, 84.1%)

**Method B:** Ligand **4** (0.035 g, 0.066 mmol) was dissolved in  $\text{CH}_3\text{OH}$  (5 cm<sup>3</sup>) and added dropwise to 0.1 M  $[\text{Re}^{\text{I}}(\text{CO})_3(\text{OH}_2)_3]\text{OTf}_{(\text{aq})}$  (0.664 mL, 0.066 mmol) stirring in a 10 cm<sup>3</sup> scintillation vial. The vial was sealed, and stirred at room temperature for 12 hr. which produced a light brown precipitate that was collected by vacuum filtration. Complex **6** was recrystallized as an off-white solid by slow addition of  $\text{Et}_2\text{O}$  to a saturated solution in  $\text{CH}_3\text{OH}$  (0.035 g, 74%).  $\delta_{\text{H}}$ (299.8 MHz,  $\text{CD}_3\text{OD}$ ) 8.84 (2 H, dd), 8.32 (1 H, s), 7.89 (2 H, m), 7.48 (2 H, m), 7.41-7.32 (7 H, m), 5.68 (2 H, s), 4.98 (2 H, s), 4.84 (4 H, dd,  $J_{\text{AB}}$  12);  $\delta_{\text{C}}$ (75.5 MHz,  $\text{CD}_3\text{OD}$ ) 195.7, 195.1, 160.5, 152.0, 140.4, 135.2, 128.9, 128.6, 128.3, 127.8, 126.8, 125.7, 123.5, 122.7, 68.1, 62.9, 54.0;  $\lambda_{\max}(\text{CH}_2\text{Cl}_2)/\text{nm}$ : 261 ( $\epsilon/\text{dm}^3 \text{ mol}^{-1} \text{ cm}^{-1}$  29 000), 295 (19 000);  $\nu_{\max}/\text{cm}^{-1}$ : 2342 ( $\text{N}_3$ ), 2028 and 1908 (CO);  $m/z$  641.4 ( $\text{M}^+$ ,

100%), 639.4 (58), 642.4 (31); Found: C, 38.16; H, 2.57; N, 10.28 Calc. for  $C_{25}H_{22}N_6O_3Re(CO_3SF_3)_{0.75}Br_{0.25} \cdot CH_2Cl_2$ : C, 38.05; H, 2.83; N, 10.05.

### **[*fac*-Re(CO)<sub>3</sub>(4)]OTf, 7.**

Complex 7 was prepared in a similar manner to that of 6, except 1, 3, and 5 were used instead of 4 and Bz, **Method A**: (50 mg, 81.0 %), **Method B**: (33 mg, 52%).  $\delta_H$ (299.8 MHz, CD<sub>3</sub>OD) 8.89 (dd, 2H), 8.44 (1 H, s), 8.30 (2 H, dt), 8.08 (2 H, m), 7.92-7.36 (5 H, m), 5.55 (2 H, s), 5.08 (2 H, s), 4.84 (4 H, dd,  $J_{AB}$  12);  $\delta_C$ (75.5 MHz, CD<sub>3</sub>OD) 195.7, 195.1, 160.5, 152.0, 142.9 (dd,  $J_{CF}$  1247), 140.4, 135.2, 128.9, 128.6, 128.3, 127.1, 126.8, 125.7 (dd,  $J_{CF}$  34), 123.5, 122.7, 118.8 (dd,  $J_{CF}$  6), 68.1, 62.9, 54.0 ;  $\lambda_{max}(CH_2Cl_2)/nm$ : 270 ( $\epsilon/dm^3 mol^{-1} cm^{-1}$  49 000);  $\nu_{max}/cm^{-1}$ : 2030 and 1926 (CO), 2360 (N<sub>3</sub>);  $m/z$  797.2 ( $M^+$ , 100%), 795.2 (58), 798.2 (31); Found: C, 33.33; H, 2.33; N, 10.42 Calc. for  $C_{27}H_{21}N_8O_6ReF_3 \cdot (OH_2)_2 \cdot (CH_2Cl_2)_2$ : C, 33.54; H, 2.82; N, 10.80.

### **General <sup>99m</sup>Tc(H<sub>2</sub>O)<sub>3</sub>(CO)<sub>3</sub><sup>+</sup> radiolabeling procedure**

The ligand (100  $\mu m^3$ , 10<sup>-4</sup>, 10<sup>-5</sup> or 10<sup>-6</sup> M) and phosphate buffer (800  $\mu L$ , 0.1 M) at pH 7.4 was added to a sealable labeling vial (5.0  $cm^3$ ). The vial was sealed and degassed with nitrogen for ~10 min. The <sup>99m</sup>Tc(H<sub>2</sub>O)<sub>3</sub>(CO)<sub>3</sub><sup>+</sup> precursor solution (100  $\mu m^3$ ) was prepared according to the Isolink® kit following Tyco specifications. The solution was added to a degassed vial and the vial heated for 60 min. at 70° C. The reaction mixture was then carefully allowed to cool on an ice bath prior to injection and analysis by radio-HPLC.

**Table 1.**  $^{99m}\text{Tc}^{\text{I}}(\text{CO})_3(\text{Ligand})$  complex labeling efficiency by direct reaction of  $[\text{}^{99m}\text{Tc}^{\text{I}}(\text{CO})_3(\text{OH}_2)_3]^+$  with ligands (**1**, **4**, **5**) at 60 min. at 70° C.

| [Ligand] (M) | <b>2A</b> | <b>6A</b> | <b>7A</b> |
|--------------|-----------|-----------|-----------|
| $10^{-5}$    | 100       | 97        | 100       |
| $10^{-6}$    | 88        | 78        | 82        |
| $10^{-7}$    | 77        | 42        | 36        |

#### General method for click reactions with **2A**.

Complex **6A** was formed through subsequent addition of PBS ( $700\mu\text{m}^3$ ), benzylazide ( $100\mu\text{m}^3$ ) and Sodium L-Ascorbate ( $100\mu\text{m}^3$ ) to a  $5\text{ cm}^3$  sealable vial. The vial was degassed with  $\text{N}_2$  for ~ 10 min. and **2A** ( $100\mu\text{m}^3$ ) was added followed by copper (II) acetate ( $100\mu\text{m}^3$ ). The mixture was then stirred at the appropriate temperature for 15 min.

**Table 2.** Labeling efficiency of the conversion of **2A** to **6A** with a reaction time of 15 minutes while varying the concentration of benzylazide ( $10^{-4} - 10^{-6}$  M) and the temperature of the reaction (70°-25° C).

| Temperature (°C) | $10^{-3}$ | $10^{-4}$ | $10^{-5}$ (M) |
|------------------|-----------|-----------|---------------|
| <b>70</b>        | 100       | 100       | 75            |
| <b>50</b>        | 100       | 100       | 61            |
| <b>37</b>        | 100       | 100       | 23            |
| <b>25</b>        | 100       | 93        | 23            |

#### Flutamide derivative click reactions with **2A**.

Complex **7A** was formed through subsequent addition of PBS ( $700\mu\text{m}^3$ ), **3** ( $100\mu\text{m}^3$ ) and Sodium L-Ascorbate ( $100\mu\text{m}^3$ ) to a  $5\text{ cm}^3$  sealable vial. The vial was degassed with  $\text{N}_2$  for ~ 10 min. and **2A** ( $100\mu\text{m}^3$ ) was added followed by copper (II) acetate ( $100\mu\text{m}^3$ ). The mixture was then stirred at the 50 °C for 15 min. producing quantitative yields at molar concentrations of  $10^{-3} - 10^{-4}$  M.



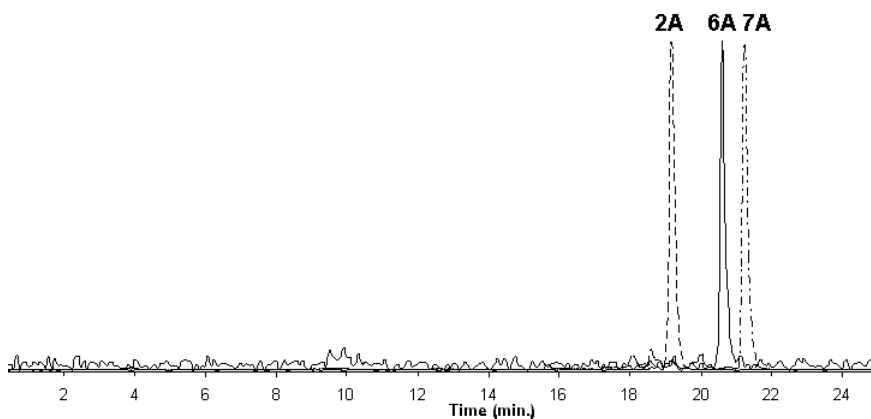

**Figure 1.**

Normalized Radio HPLC traces of **2A**, **6A**, and **7A**. All plots were HPLC purified before reinjection.

### **X-ray experimental**

Crystals of compounds **2**, **6**, and **7** were removed from the flask and covered with a layer of hydrocarbon oil. A suitable crystal was selected, attached to a glass fiber and placed in the low-temperature nitrogen stream.<sup>4</sup> Data (**2** and **7**) were collected at low temperatures using a Bruker/Siemens SMART APEX instrument (Mo K $\alpha$  radiation,  $\lambda = 0.71073 \text{ \AA}$ ) equipped with a Cryocool NeverIce low temperature device. Data for **6** were collected on a Kappa CCD (Mo K $\alpha$  radiation,  $\lambda = 0.71073 \text{ \AA}$ ) using phi and omega scans. Data for **2** and **7** were measured using omega scans of  $0.3^\circ$  per frame for various exposures, and a full sphere of data was collected in each case. A total of 2400 frames were collected with final resolutions of  $0.77 \text{ \AA}$ . Cell parameters were retrieved using SMART<sup>5</sup> software and refined using SAINTPlus<sup>6</sup> on all observed reflections. Data reduction and correction for Lp and decay were performed using the SAINTPlus software. Absorption corrections were applied using SADABS.<sup>7</sup> Data for **6** were collected at low temperature on a Nonius Kappa CCD (Mo K $\alpha$  radiation,  $\lambda = 0.71073 \text{ \AA}$ ) using phi and omega scans. A total of 532 frames were collected with 120 seconds per frame exposure time. 2994 reflections were used for unit cell refinement. The final resolution of the structure was  $0.76 \text{ \AA}$ . Absorption corrections were performed using HKL Scalepack. Structures of **2**, **6**, and **7** were solved by direct methods and refined by least squares method on  $F^2$  using the SHELXTL<sup>8</sup> program package. Each structure was solved by analysis of systematic absences. All non-hydrogen atoms were refined anisotropically. Hydrogen atoms were added geometrically (riding model). No decomposition of crystals was observed during data collection. Details of the data collection and refinement are given in Tables 1, 3 and 5.

**Table 3.** Crystal data and structure refinement for **2**.

|                                                     |                                                                                                                                                           |
|-----------------------------------------------------|-----------------------------------------------------------------------------------------------------------------------------------------------------------|
| Formula                                             | Re(C <sub>15</sub> H <sub>15</sub> N <sub>3</sub> )(CO) <sub>3</sub> ][CF <sub>3</sub> SO <sub>3</sub> ] <sub>2</sub> ·1.5CH <sub>2</sub> Cl <sub>2</sub> |
| Formula weight                                      | 1567.98 g mol <sup>-1</sup>                                                                                                                               |
| Temperature                                         | 293(2) K                                                                                                                                                  |
| Wavelength                                          | 0.71073 Å                                                                                                                                                 |
| Crystal system                                      | monoclinic                                                                                                                                                |
| Space group                                         | <i>C</i> 2/ <i>m</i>                                                                                                                                      |
| Unit cell dimensions                                | <i>a</i> = 29.647(3) Å<br><i>b</i> = 10.4289(11) Å<br><i>c</i> = 8.1706(9) Å<br>$\alpha$ = 90°<br>$\beta$ = 100.620(5)°<br>$\gamma$ = 90°                 |
| Volume                                              | 2483.0(5) Å <sup>3</sup>                                                                                                                                  |
| <i>Z</i>                                            | 2                                                                                                                                                         |
| Density (calculated)                                | 2.097 Mg/m <sup>3</sup>                                                                                                                                   |
| Absorption coefficient                              | 5.368 mm <sup>-1</sup>                                                                                                                                    |
| F(000)                                              | 1516                                                                                                                                                      |
| Crystal size                                        | 0.20 × 0.03 × 0.02 mm <sup>3</sup>                                                                                                                        |
| Theta range for data collection                     | 3.11 to 24.99°                                                                                                                                            |
| Index ranges                                        | -35 ≤ <i>h</i> ≤ 35, -12 ≤ <i>k</i> ≤ 12, -9 ≤ <i>l</i> ≤ 9                                                                                               |
| Reflections collected                               | 8477                                                                                                                                                      |
| Independent reflections                             | 2318 [ <i>R</i> ( <i>int</i> ) = 0.0349]                                                                                                                  |
| Completeness to theta = 24.99°                      | 99.7 %                                                                                                                                                    |
| Max. and min. transmission                          | 0.9002 and 0.4132                                                                                                                                         |
| Refinement method                                   | Full-matrix least-squares on <i>F</i> <sup>2</sup>                                                                                                        |
| Data / restraints / parameters                      | 2318 / 68 / 158                                                                                                                                           |
| Goodness-of-fit on <i>F</i> <sup>2</sup>            | 1.071                                                                                                                                                     |
| Final <i>R</i> indices [ <i>I</i> > 2σ( <i>I</i> )] | <i>R</i> <sub>1</sub> = 0.0454, <i>wR</i> <sub>2</sub> = 0.1239                                                                                           |
| <i>R</i> indices (all data)                         | <i>R</i> <sub>1</sub> = 0.0517, <i>wR</i> <sub>2</sub> = 0.1283                                                                                           |
| Extinction coefficient                              | 0.0012(3)                                                                                                                                                 |
| Largest diff. peak and hole                         | 2.438 and -2.021 eÅ <sup>-3</sup>                                                                                                                         |

**Table 4.** Bond lengths [Å] and angles [°] for **2**.

|                      |           |                      |           |
|----------------------|-----------|----------------------|-----------|
| S(1A)-O(4A)#1        | 1.400(9)  | F(2A)-C(12A)-S(1A)   | 109.7(7)  |
| S(1A)-O(4A)          | 1.400(9)  | F(2A)#1-C(12A)-S(1A) | 109.7(7)  |
| S(1A)-O(3A)          | 1.428(13) | O(4B)#1-S(1B)-O(4B)  | 118.2(12) |
| S(1A)-C(12A)         | 1.820(16) | O(4B)#1-S(1B)-O(3B)  | 110.6(8)  |
| C(12A)-F(1A)         | 1.330(5)  | O(4B)-S(1B)-O(3B)    | 110.6(8)  |
| C(12A)-F(2A)         | 1.332(5)  | O(4B)#1-S(1B)-C(12B) | 106.3(6)  |
| C(12A)-F(2A)#1       | 1.332(5)  | O(4B)-S(1B)-C(12B)   | 106.3(6)  |
| S(1B)-O(4B)#1        | 1.400(9)  | O(3B)-S(1B)-C(12B)   | 103.7(8)  |
| S(1B)-O(4B)          | 1.400(9)  | F(2B)-C(12B)-F(1B)   | 109.2(9)  |
| S(1B)-O(3B)          | 1.429(13) | F(2B)-C(12B)-F(1B)#1 | 109.2(9)  |
| S(1B)-C(12B)         | 1.796(15) | F(1B)-C(12B)-F(1B)#1 | 102.6(12) |
| C(12B)-F(2B)         | 1.331(5)  | F(2B)-C(12B)-S(1B)   | 110.9(9)  |
| C(12B)-F(1B)         | 1.333(5)  | F(1B)-C(12B)-S(1B)   | 112.3(7)  |
| C(12B)-F(1B)#1       | 1.333(5)  | F(1B)#1-C(12B)-S(1B) | 112.3(7)  |
| Re(1)-C(2)           | 1.909(12) | C(2)-Re(1)-C(1)      | 88.4(3)   |
| Re(1)-C(1)           | 1.942(10) | C(2)-Re(1)-C(1)#2    | 88.4(3)   |
| Re(1)-C(1)#2         | 1.942(10) | C(1)-Re(1)-C(1)#2    | 90.1(5)   |
| Re(1)-N(1)           | 2.171(7)  | C(2)-Re(1)-N(1)      | 98.0(3)   |
| Re(1)-N(1)#2         | 2.171(7)  | C(1)-Re(1)-N(1)      | 94.8(3)   |
| Re(1)-N(2)           | 2.223(8)  | C(1)#2-Re(1)-N(1)    | 172.1(3)  |
| N(2)-C(8)#2          | 1.485(10) | C(2)-Re(1)-N(1)#2    | 98.0(3)   |
| N(2)-C(8)            | 1.485(10) | C(1)-Re(1)-N(1)#2    | 172.1(3)  |
| N(2)-C(9)            | 1.510(15) | C(1)#2-Re(1)-N(1)#2  | 94.8(3)   |
| C(2)-O(2)            | 1.158(14) | N(1)-Re(1)-N(1)#2    | 79.7(3)   |
| N(1)-C(3)            | 1.346(11) | C(2)-Re(1)-N(2)      | 174.1(4)  |
| N(1)-C(7)            | 1.356(9)  | C(1)-Re(1)-N(2)      | 95.8(3)   |
| C(1)-O(1)            | 1.135(10) | C(1)#2-Re(1)-N(2)    | 95.8(3)   |
| C(7)-C(6)            | 1.373(12) | N(1)-Re(1)-N(2)      | 77.5(2)   |
| C(7)-C(8)            | 1.486(11) | N(1)#2-Re(1)-N(2)    | 77.5(2)   |
| C(8)-H(8A)           | 0.9700    | C(8)#2-N(2)-C(8)     | 109.4(9)  |
| C(8)-H(8B)           | 0.9700    | C(8)#2-N(2)-C(9)     | 109.0(6)  |
| C(9)-C(10)           | 1.487(17) | C(8)-N(2)-C(9)       | 109.0(6)  |
| C(9)-H(9A)           | 0.9700    | C(8)#2-N(2)-Re(1)    | 109.1(5)  |
| C(9)-H(9B)           | 0.9700    | C(8)-N(2)-Re(1)      | 109.1(5)  |
| C(3)-C(4)            | 1.356(13) | C(9)-N(2)-Re(1)      | 111.2(7)  |
| C(3)-H(3)            | 0.9300    | O(2)-C(2)-Re(1)      | 179.5(9)  |
| C(6)-C(5)            | 1.381(14) | C(3)-N(1)-C(7)       | 118.7(7)  |
| C(6)-H(6)            | 0.9300    | C(3)-N(1)-Re(1)      | 125.3(5)  |
| C(4)-C(5)            | 1.402(14) | C(7)-N(1)-Re(1)      | 115.3(5)  |
| C(4)-H(4)            | 0.9300    | O(1)-C(1)-Re(1)      | 179.1(8)  |
| C(10)-C(11)          | 1.145(19) | N(1)-C(7)-C(6)       | 121.1(8)  |
| C(5)-H(5)            | 0.9300    | N(1)-C(7)-C(8)       | 116.7(7)  |
| C(11)-H(11)          | 0.9300    | C(6)-C(7)-C(8)       | 122.1(7)  |
|                      |           | N(2)-C(8)-C(7)       | 111.8(7)  |
| O(4A)#1-S(1A)-O(4A)  | 118.2(13) | N(2)-C(8)-H(8A)      | 109.3     |
| O(4A)#1-S(1A)-O(3A)  | 112.4(7)  | C(7)-C(8)-H(8A)      | 109.3     |
| O(4A)-S(1A)-O(3A)    | 112.4(7)  | N(2)-C(8)-H(8B)      | 109.3     |
| O(4A)#1-S(1A)-C(12A) | 104.9(6)  | C(7)-C(8)-H(8B)      | 109.3     |
| O(4A)-S(1A)-C(12A)   | 104.9(6)  | H(8A)-C(8)-H(8B)     | 107.9     |
| O(3A)-S(1A)-C(12A)   | 102.1(8)  | C(10)-C(9)-N(2)      | 113.8(11) |
| F(1A)-C(12A)-F(2A)   | 109.4(9)  | C(10)-C(9)-H(9A)     | 108.8     |
| F(1A)-C(12A)-F(2A)#1 | 109.4(9)  | N(2)-C(9)-H(9A)      | 108.8     |
| F(2A)-C(12A)-F(2A)#1 | 109.4(13) | C(10)-C(9)-H(9B)     | 108.8     |
| F(1A)-C(12A)-S(1A)   | 109.1(9)  | N(2)-C(9)-H(9B)      | 108.8     |

Electronic Supplementary Information for Dalton Transactions  
This journal is © The Royal Society of Chemistry 2010

|                   |           |
|-------------------|-----------|
| H(9A)-C(9)-H(9B)  | 107.7     |
| N(1)-C(3)-C(4)    | 122.9(8)  |
| N(1)-C(3)-H(3)    | 118.6     |
| C(4)-C(3)-H(3)    | 118.6     |
| C(7)-C(6)-C(5)    | 120.0(8)  |
| C(7)-C(6)-H(6)    | 120.0     |
| C(5)-C(6)-H(6)    | 120.0     |
| C(3)-C(4)-C(5)    | 118.8(9)  |
| C(3)-C(4)-H(4)    | 120.6     |
| C(5)-C(4)-H(4)    | 120.6     |
| C(11)-C(10)-C(9)  | 174.1(17) |
| C(6)-C(5)-C(4)    | 118.4(9)  |
| C(6)-C(5)-H(5)    | 120.8     |
| C(4)-C(5)-H(5)    | 120.8     |
| C(10)-C(11)-H(11) | 180.0     |

---

Symmetry transformations used to generate  
equivalent atoms: #1: x,-y+1,z #2 x,-y+2,z

**Table 5.** Crystal data and structure refinement for **6**.

|                                   |                                                                                                                                                |
|-----------------------------------|------------------------------------------------------------------------------------------------------------------------------------------------|
| Formula                           | [Re(C <sub>22</sub> H <sub>22</sub> N <sub>6</sub> )(CO) <sub>3</sub> ][CF <sub>3</sub> SO <sub>3</sub> ] <sub>1.27</sub> [Br] <sub>0.73</sub> |
| Formula weight                    | 1527.64 gmol <sup>-1</sup>                                                                                                                     |
| Temperature                       | 210(2) K                                                                                                                                       |
| Wavelength                        | 0.71073 Å                                                                                                                                      |
| Crystal system                    | monoclinic                                                                                                                                     |
| Space group                       | <i>P</i> 2 <sub>1</sub> / <i>c</i>                                                                                                             |
| Unit cell dimensions              | <i>a</i> = 10.2803(11) Å<br><i>b</i> = 18.7456(19) Å<br><i>c</i> = 30.539(4) Å<br>$\alpha$ = 90°.<br>$\beta$ = 99.339(5)°.<br>$\gamma$ = 90°.  |
| Volume                            | 5807.2(11) Å <sup>3</sup>                                                                                                                      |
| <i>Z</i>                          | 4                                                                                                                                              |
| Density (calculated)              | 1.747 Mg/m <sup>3</sup>                                                                                                                        |
| Absorption coefficient            | 4.803 mm <sup>-1</sup>                                                                                                                         |
| F(000)                            | 2974                                                                                                                                           |
| Crystal size                      | 0.22 × 0.05 × 0.04 mm <sup>3</sup>                                                                                                             |
| Theta range for data collection   | 2.01 to 25.00°.                                                                                                                                |
| Index ranges                      | -12 ≤ <i>h</i> ≤ 12, -22 ≤ <i>k</i> ≤ 22, -36 ≤ <i>l</i> ≤ 36                                                                                  |
| Reflections collected             | 35711                                                                                                                                          |
| Independent reflections           | 10203 [R( <i>int</i> ) = 0.0655]                                                                                                               |
| Completeness to theta = 25.00°    | 99.8 %                                                                                                                                         |
| Max. and min. transmission        | 0.8311 and 0.4180                                                                                                                              |
| Refinement method                 | Full-matrix least-squares on F <sup>2</sup>                                                                                                    |
| Data / restraints / parameters    | 10203 / 101 / 738                                                                                                                              |
| Goodness-of-fit on F <sup>2</sup> | 1.072                                                                                                                                          |
| Final R indices [I > 2σ(I)]       | R <sub>1</sub> = 0.0475, wR <sub>2</sub> = 0.1247                                                                                              |
| R indices (all data)              | R <sub>1</sub> = 0.0760, wR <sub>2</sub> = 0.1375                                                                                              |
| Largest diff. peak and hole       | 2.037 and -1.607 eÅ <sup>-3</sup>                                                                                                              |

**Table 6.** Bond lengths [Å] and angles [°] for **6**.

|               |           |              |           |
|---------------|-----------|--------------|-----------|
| C(44A)-C(45A) | 1.443(14) | Re(1)-N(2)   | 2.230(6)  |
| C(44A)-N(12)  | 1.513(12) | C(3)-O(3)    | 1.132(9)  |
| C(44A)-H(44A) | 0.9800    | C(2)-O(2)    | 1.165(10) |
| C(44A)-H(44B) | 0.9800    | C(1)-O(1)    | 1.141(10) |
| C(45A)-C(46A) | 1.3900    | C(10)-N(2)   | 1.511(10) |
| C(45A)-C(50A) | 1.3900    | C(10)-C(11)  | 1.523(12) |
| C(46A)-C(47A) | 1.3900    | C(10)-H(10A) | 0.9800    |
| C(46A)-H(46A) | 0.9400    | C(10)-H(10B) | 0.9800    |
| C(47A)-C(48A) | 1.3900    | C(29)-N(7)   | 1.337(10) |
| C(47A)-H(47A) | 0.9400    | C(29)-C(30)  | 1.343(12) |
| C(48A)-C(49A) | 1.3900    | C(29)-H(29)  | 0.9400    |
| C(48A)-H(48A) | 0.9400    | C(18)-N(6)   | 1.360(11) |
| C(49A)-C(50A) | 1.3900    | C(18)-C(17)  | 1.384(12) |
| C(49A)-H(49A) | 0.9400    | C(18)-H(18)  | 0.9400    |
| C(50A)-H(50A) | 0.9400    | C(32)-C(33)  | 1.363(12) |
| C(45B)-C(46B) | 1.3900    | C(32)-C(31)  | 1.381(13) |
| C(45B)-C(50B) | 1.3900    | C(32)-H(32)  | 0.9400    |
| C(46B)-C(47B) | 1.3900    | C(4)-N(1)    | 1.342(11) |
| C(46B)-H(46B) | 0.9400    | C(4)-C(5)    | 1.386(13) |
| C(47B)-C(48B) | 1.3900    | C(4)-H(4)    | 0.9400    |
| C(47B)-H(47B) | 0.9400    | N(1)-C(8)    | 1.347(10) |
| C(48B)-C(49B) | 1.3900    | C(34)-C(33)  | 1.479(11) |
| C(48B)-H(48B) | 0.9400    | C(34)-N(8)   | 1.507(9)  |
| C(49B)-C(50B) | 1.3900    | C(34)-H(34A) | 0.9800    |
| C(49B)-H(49B) | 0.9400    | C(34)-H(34B) | 0.9800    |
| C(50B)-H(50B) | 0.9400    | N(8)-C(35)   | 1.477(10) |
| S(1)-O(9)     | 1.434(9)  | N(8)-C(41)   | 1.512(9)  |
| S(1)-O(7)     | 1.435(9)  | C(7)-C(8)    | 1.373(11) |
| S(1)-O(8)     | 1.454(9)  | C(7)-C(6)    | 1.379(14) |
| S(1)-C(51)    | 1.783(13) | C(7)-H(7)    | 0.9400    |
| C(51)-F(1)    | 1.301(11) | C(37)-C(38)  | 1.366(14) |
| C(51)-F(3)    | 1.308(10) | C(37)-C(36)  | 1.384(11) |
| C(51)-F(2)    | 1.323(11) | C(37)-H(37)  | 0.9400    |
| S(2)-O(12)    | 1.402(12) | N(7)-C(33)   | 1.352(10) |
| S(2)-O(10)    | 1.469(12) | N(3)-C(11)   | 1.350(11) |
| S(2)-O(11)    | 1.487(11) | N(3)-C(15)   | 1.359(11) |
| S(2)-C(52)    | 1.751(15) | C(38)-C(39)  | 1.346(14) |
| C(52)-F(6)    | 1.283(14) | C(38)-H(38)  | 0.9400    |
| C(52)-F(4)    | 1.315(14) | N(6)-N(5)    | 1.320(10) |
| C(52)-F(5)    | 1.363(13) | N(6)-C(19)   | 1.455(11) |
| Re(2)-C(26)   | 1.917(9)  | C(36)-N(9)   | 1.365(10) |
| Re(2)-C(27)   | 1.925(9)  | C(36)-C(35)  | 1.473(11) |
| Re(2)-C(28)   | 1.926(9)  | C(41)-C(42)  | 1.500(11) |
| Re(2)-N(7)    | 2.175(6)  | C(41)-H(41A) | 0.9800    |
| Re(2)-N(9)    | 2.182(6)  | C(41)-H(41B) | 0.9800    |
| Re(2)-N(8)    | 2.237(6)  | C(25)-C(20)  | 1.379(15) |
| C(27)-O(5)    | 1.135(10) | C(25)-C(24)  | 1.425(18) |
| C(26)-O(4)    | 1.157(10) | C(25)-H(25)  | 0.9400    |
| C(28)-O(6)    | 1.153(9)  | C(19)-C(20)  | 1.508(13) |
| Re(1)-C(2)    | 1.894(9)  | C(19)-H(19A) | 0.9800    |
| Re(1)-C(1)    | 1.928(10) | C(19)-H(19B) | 0.9800    |
| Re(1)-C(3)    | 1.934(9)  | C(40)-N(9)   | 1.336(10) |
| Re(1)-N(3)    | 2.169(7)  | C(40)-C(39)  | 1.391(12) |
| Re(1)-N(1)    | 2.179(7)  | C(40)-H(40)  | 0.9400    |
|               |           | N(12)-N(11)  | 1.327(10) |

|                      |           |                      |           |
|----------------------|-----------|----------------------|-----------|
| N(12)-C(43)          | 1.348(11) | C(47A)-C(48A)-C(49A) | 120.0     |
| C(42)-C(43)          | 1.352(11) | C(47A)-C(48A)-H(48A) | 120.0     |
| C(42)-N(10)          | 1.380(10) | C(49A)-C(48A)-H(48A) | 120.0     |
| N(11)-N(10)          | 1.318(10) | C(48A)-C(49A)-C(50A) | 120.0     |
| C(20)-C(21)          | 1.352(17) | C(48A)-C(49A)-H(49A) | 120.0     |
| C(43)-H(43)          | 0.9400    | C(50A)-C(49A)-H(49A) | 120.0     |
| N(4)-N(5)            | 1.318(10) | C(49A)-C(50A)-C(45A) | 120.0     |
| N(4)-C(17)           | 1.376(10) | C(49A)-C(50A)-H(50A) | 120.0     |
| C(17)-C(16)          | 1.477(11) | C(45A)-C(50A)-H(50A) | 120.0     |
| C(9)-C(8)            | 1.465(12) | C(46B)-C(45B)-C(50B) | 120.0     |
| C(9)-N(2)            | 1.475(10) | C(47B)-C(46B)-C(45B) | 120.0     |
| C(9)-H(9A)           | 0.9800    | C(47B)-C(46B)-H(46B) | 120.0     |
| C(9)-H(9B)           | 0.9800    | C(45B)-C(46B)-H(46B) | 120.0     |
| C(35)-H(35A)         | 0.9800    | C(46B)-C(47B)-C(48B) | 120.0     |
| C(35)-H(35B)         | 0.9800    | C(46B)-C(47B)-H(47B) | 120.0     |
| C(16)-N(2)           | 1.512(10) | C(48B)-C(47B)-H(47B) | 120.0     |
| C(16)-H(16A)         | 0.9800    | C(49B)-C(48B)-C(47B) | 120.0     |
| C(16)-H(16B)         | 0.9800    | C(49B)-C(48B)-H(48B) | 120.0     |
| C(21)-C(22)          | 1.422(17) | C(47B)-C(48B)-H(48B) | 120.0     |
| C(21)-H(21)          | 0.9400    | C(48B)-C(49B)-C(50B) | 120.0     |
| C(39)-H(39)          | 0.9400    | C(48B)-C(49B)-H(49B) | 120.0     |
| C(24)-C(23)          | 1.310(19) | C(50B)-C(49B)-H(49B) | 120.0     |
| C(24)-H(24)          | 0.9400    | C(49B)-C(50B)-C(45B) | 120.0     |
| C(14)-C(13)          | 1.345(16) | C(49B)-C(50B)-H(50B) | 120.0     |
| C(14)-C(15)          | 1.367(13) | C(45B)-C(50B)-H(50B) | 120.0     |
| C(14)-H(14)          | 0.9400    | O(9)-S(1)-O(7)       | 117.2(7)  |
| C(22)-C(23)          | 1.37(2)   | O(9)-S(1)-O(8)       | 114.3(7)  |
| C(22)-H(22)          | 0.9400    | O(7)-S(1)-O(8)       | 114.7(6)  |
| C(15)-H(15)          | 0.9400    | O(9)-S(1)-C(51)      | 103.8(5)  |
| C(30)-C(31)          | 1.389(14) | O(7)-S(1)-C(51)      | 101.9(6)  |
| C(30)-H(30)          | 0.9400    | O(8)-S(1)-C(51)      | 102.1(6)  |
| C(31)-H(31)          | 0.9400    | F(1)-C(51)-F(3)      | 106.0(10) |
| C(5)-C(6)            | 1.371(14) | F(1)-C(51)-F(2)      | 102.4(10) |
| C(5)-H(5)            | 0.9400    | F(3)-C(51)-F(2)      | 107.9(10) |
| C(23)-H(23)          | 0.9400    | F(1)-C(51)-S(1)      | 113.5(9)  |
| C(11)-C(12)          | 1.372(12) | F(3)-C(51)-S(1)      | 112.8(8)  |
| C(6)-H(6)            | 0.9400    | F(2)-C(51)-S(1)      | 113.5(8)  |
| C(13)-C(12)          | 1.417(15) | O(12)-S(2)-O(10)     | 118.8(11) |
| C(13)-H(13)          | 0.9400    | O(12)-S(2)-O(11)     | 115.0(10) |
| C(12)-H(12)          | 0.9400    | O(10)-S(2)-O(11)     | 108.6(9)  |
|                      |           | O(12)-S(2)-C(52)     | 104.3(9)  |
| C(45A)-C(44A)-N(12)  | 110.9(9)  | O(10)-S(2)-C(52)     | 102.2(9)  |
| C(45A)-C(44A)-H(44A) | 109.5     | O(11)-S(2)-C(52)     | 106.3(8)  |
| N(12)-C(44A)-H(44A)  | 109.5     | F(6)-C(52)-F(4)      | 108.3(19) |
| C(45A)-C(44A)-H(44B) | 109.5     | F(6)-C(52)-F(5)      | 105.0(15) |
| N(12)-C(44A)-H(44B)  | 109.5     | F(4)-C(52)-F(5)      | 110.9(15) |
| H(44A)-C(44A)-H(44B) | 108.0     | F(6)-C(52)-S(2)      | 111.6(11) |
| C(46A)-C(45A)-C(50A) | 120.0     | F(4)-C(52)-S(2)      | 112.9(11) |
| C(46A)-C(45A)-C(44A) | 120.1(7)  | F(5)-C(52)-S(2)      | 107.8(11) |
| C(50A)-C(45A)-C(44A) | 119.8(6)  | C(26)-Re(2)-C(27)    | 86.4(3)   |
| C(45A)-C(46A)-C(47A) | 120.0     | C(26)-Re(2)-C(28)    | 90.8(3)   |
| C(45A)-C(46A)-H(46A) | 120.0     | C(27)-Re(2)-C(28)    | 88.5(3)   |
| C(47A)-C(46A)-H(46A) | 120.0     | C(26)-Re(2)-N(7)     | 174.5(3)  |
| C(48A)-C(47A)-C(46A) | 120.0     | C(27)-Re(2)-N(7)     | 95.9(3)   |
| C(48A)-C(47A)-H(47A) | 120.0     | C(28)-Re(2)-N(7)     | 94.2(3)   |
| C(46A)-C(47A)-H(47A) | 120.0     | C(26)-Re(2)-N(9)     | 95.6(3)   |



|                     |          |                     |           |
|---------------------|----------|---------------------|-----------|
| C(27)-Re(2)-N(9)    | 98.2(3)  | C(35)-N(8)-C(34)    | 110.8(6)  |
| C(28)-Re(2)-N(9)    | 170.9(3) | C(35)-N(8)-C(41)    | 110.1(6)  |
| N(7)-Re(2)-N(9)     | 79.2(2)  | C(34)-N(8)-C(41)    | 109.5(6)  |
| C(26)-Re(2)-N(8)    | 98.2(3)  | C(35)-N(8)-Re(2)    | 105.2(4)  |
| C(27)-Re(2)-N(8)    | 173.2(3) | C(34)-N(8)-Re(2)    | 108.7(5)  |
| C(28)-Re(2)-N(8)    | 96.3(3)  | C(41)-N(8)-Re(2)    | 112.4(4)  |
| N(7)-Re(2)-N(8)     | 79.1(2)  | C(8)-C(7)-C(6)      | 119.6(9)  |
| N(9)-Re(2)-N(8)     | 76.5(2)  | C(8)-C(7)-H(7)      | 120.2     |
| O(5)-C(27)-Re(2)    | 178.7(8) | C(6)-C(7)-H(7)      | 120.2     |
| O(4)-C(26)-Re(2)    | 176.7(7) | C(38)-C(37)-C(36)   | 119.9(10) |
| O(6)-C(28)-Re(2)    | 178.7(7) | C(38)-C(37)-H(37)   | 120.1     |
| C(2)-Re(1)-C(1)     | 85.2(4)  | C(36)-C(37)-H(37)   | 120.1     |
| C(2)-Re(1)-C(3)     | 88.0(3)  | C(29)-N(7)-C(33)    | 118.6(7)  |
| C(1)-Re(1)-C(3)     | 91.1(4)  | C(29)-N(7)-Re(2)    | 125.5(6)  |
| C(2)-Re(1)-N(3)     | 98.0(3)  | C(33)-N(7)-Re(2)    | 115.5(5)  |
| C(1)-Re(1)-N(3)     | 94.1(3)  | C(11)-N(3)-C(15)    | 117.5(8)  |
| C(3)-Re(1)-N(3)     | 172.3(3) | C(11)-N(3)-Re(1)    | 116.5(6)  |
| C(2)-Re(1)-N(1)     | 97.4(3)  | C(15)-N(3)-Re(1)    | 125.5(7)  |
| C(1)-Re(1)-N(1)     | 174.1(3) | C(39)-C(38)-C(37)   | 120.6(9)  |
| C(3)-Re(1)-N(1)     | 94.3(3)  | C(39)-C(38)-H(38)   | 119.7     |
| N(3)-Re(1)-N(1)     | 80.2(3)  | C(37)-C(38)-H(38)   | 119.7     |
| C(2)-Re(1)-N(2)     | 173.8(3) | N(5)-N(6)-C(18)     | 110.4(7)  |
| C(1)-Re(1)-N(2)     | 98.5(3)  | N(5)-N(6)-C(19)     | 121.2(8)  |
| C(3)-Re(1)-N(2)     | 96.9(3)  | C(18)-N(6)-C(19)    | 128.3(8)  |
| N(3)-Re(1)-N(2)     | 76.8(3)  | N(9)-C(36)-C(37)    | 119.9(8)  |
| N(1)-Re(1)-N(2)     | 78.5(2)  | N(9)-C(36)-C(35)    | 115.4(7)  |
| O(3)-C(3)-Re(1)     | 177.6(8) | C(37)-C(36)-C(35)   | 124.6(8)  |
| O(2)-C(2)-Re(1)     | 177.8(8) | C(42)-C(41)-N(8)    | 113.2(6)  |
| O(1)-C(1)-Re(1)     | 175.5(8) | C(42)-C(41)-H(41A)  | 108.9     |
| N(2)-C(10)-C(11)    | 109.6(7) | N(8)-C(41)-H(41A)   | 108.9     |
| N(2)-C(10)-H(10A)   | 109.7    | C(42)-C(41)-H(41B)  | 108.9     |
| C(11)-C(10)-H(10A)  | 109.7    | N(8)-C(41)-H(41B)   | 108.9     |
| N(2)-C(10)-H(10B)   | 109.7    | H(41A)-C(41)-H(41B) | 107.7     |
| C(11)-C(10)-H(10B)  | 109.7    | C(20)-C(25)-C(24)   | 119.4(13) |
| H(10A)-C(10)-H(10B) | 108.2    | C(20)-C(25)-H(25)   | 120.3     |
| N(7)-C(29)-C(30)    | 124.0(9) | C(24)-C(25)-H(25)   | 120.3     |
| N(7)-C(29)-H(29)    | 118.0    | N(6)-C(19)-C(20)    | 112.1(8)  |
| C(30)-C(29)-H(29)   | 118.0    | N(6)-C(19)-H(19A)   | 109.2     |
| N(6)-C(18)-C(17)    | 105.8(8) | C(20)-C(19)-H(19A)  | 109.2     |
| N(6)-C(18)-H(18)    | 127.1    | N(6)-C(19)-H(19B)   | 109.2     |
| C(17)-C(18)-H(18)   | 127.1    | C(20)-C(19)-H(19B)  | 109.2     |
| C(33)-C(32)-C(31)   | 120.9(9) | H(19A)-C(19)-H(19B) | 107.9     |
| C(33)-C(32)-H(32)   | 119.6    | N(9)-C(40)-C(39)    | 122.5(9)  |
| C(31)-C(32)-H(32)   | 119.6    | N(9)-C(40)-H(40)    | 118.7     |
| N(1)-C(4)-C(5)      | 123.1(9) | C(39)-C(40)-H(40)   | 118.7     |
| N(1)-C(4)-H(4)      | 118.5    | N(7)-C(33)-C(32)    | 120.1(8)  |
| C(5)-C(4)-H(4)      | 118.5    | N(7)-C(33)-C(34)    | 118.0(7)  |
| C(4)-N(1)-C(8)      | 120.0(8) | C(32)-C(33)-C(34)   | 121.8(8)  |
| C(4)-N(1)-Re(1)     | 123.9(6) | N(11)-N(12)-C(43)   | 111.5(7)  |
| C(8)-N(1)-Re(1)     | 115.4(6) | N(11)-N(12)-C(44A)  | 119.7(8)  |
| C(33)-C(34)-N(8)    | 115.8(7) | C(43)-N(12)-C(44A)  | 128.7(8)  |
| C(33)-C(34)-H(34A)  | 108.3    | C(43)-C(42)-N(10)   | 106.7(7)  |
| N(8)-C(34)-H(34A)   | 108.3    | C(43)-C(42)-C(41)   | 131.2(8)  |
| C(33)-C(34)-H(34B)  | 108.3    | N(10)-C(42)-C(41)   | 122.1(7)  |
| N(8)-C(34)-H(34B)   | 108.3    | N(10)-N(11)-N(12)   | 106.4(7)  |
| H(34A)-C(34)-H(34B) | 107.4    | C(21)-C(20)-C(25)   | 119.0(11) |

|                     |           |                   |           |
|---------------------|-----------|-------------------|-----------|
| C(21)-C(20)-C(19)   | 118.9(11) | N(3)-C(15)-C(14)  | 122.4(10) |
| C(25)-C(20)-C(19)   | 122.1(11) | N(3)-C(15)-H(15)  | 118.8     |
| N(11)-N(10)-C(42)   | 109.6(7)  | C(14)-C(15)-H(15) | 118.8     |
| N(12)-C(43)-C(42)   | 105.8(8)  | C(29)-C(30)-C(31) | 118.2(9)  |
| N(12)-C(43)-H(43)   | 127.1     | C(29)-C(30)-H(30) | 120.9     |
| C(42)-C(43)-H(43)   | 127.1     | C(31)-C(30)-H(30) | 120.9     |
| C(40)-N(9)-C(36)    | 118.8(7)  | C(32)-C(31)-C(30) | 118.1(9)  |
| C(40)-N(9)-Re(2)    | 126.0(6)  | C(32)-C(31)-H(31) | 120.9     |
| C(36)-N(9)-Re(2)    | 114.5(5)  | C(30)-C(31)-H(31) | 120.9     |
| N(5)-N(4)-C(17)     | 109.4(7)  | C(6)-C(5)-C(4)    | 115.9(9)  |
| N(4)-C(17)-C(18)    | 106.2(8)  | C(6)-C(5)-H(5)    | 122.0     |
| N(4)-C(17)-C(16)    | 122.9(7)  | C(4)-C(5)-H(5)    | 122.0     |
| C(18)-C(17)-C(16)   | 130.9(8)  | C(24)-C(23)-C(22) | 119.4(14) |
| N(4)-N(5)-N(6)      | 108.2(7)  | C(24)-C(23)-H(23) | 120.3     |
| C(8)-C(9)-N(2)      | 117.0(7)  | C(22)-C(23)-H(23) | 120.3     |
| C(8)-C(9)-H(9A)     | 108.0     | N(3)-C(11)-C(12)  | 123.0(9)  |
| N(2)-C(9)-H(9A)     | 108.0     | N(3)-C(11)-C(10)  | 115.2(7)  |
| C(8)-C(9)-H(9B)     | 108.0     | C(12)-C(11)-C(10) | 121.7(9)  |
| N(2)-C(9)-H(9B)     | 108.0     | C(5)-C(6)-C(7)    | 121.3(9)  |
| H(9A)-C(9)-H(9B)    | 107.3     | C(5)-C(6)-H(6)    | 119.4     |
| C(36)-C(35)-N(8)    | 111.4(7)  | C(7)-C(6)-H(6)    | 119.4     |
| C(36)-C(35)-H(35A)  | 109.3     | C(14)-C(13)-C(12) | 119.6(10) |
| N(8)-C(35)-H(35A)   | 109.3     | C(14)-C(13)-H(13) | 120.2     |
| C(36)-C(35)-H(35B)  | 109.3     | C(12)-C(13)-H(13) | 120.2     |
| N(8)-C(35)-H(35B)   | 109.3     | C(11)-C(12)-C(13) | 117.5(10) |
| H(35A)-C(35)-H(35B) | 108.0     | C(11)-C(12)-H(12) | 121.2     |
| C(17)-C(16)-N(2)    | 113.6(6)  | C(13)-C(12)-H(12) | 121.2     |
| C(17)-C(16)-H(16A)  | 108.8     |                   |           |
| N(2)-C(16)-H(16A)   | 108.8     |                   |           |
| C(17)-C(16)-H(16B)  | 108.8     |                   |           |
| N(2)-C(16)-H(16B)   | 108.8     |                   |           |
| H(16A)-C(16)-H(16B) | 107.7     |                   |           |
| C(9)-N(2)-C(10)     | 111.0(6)  |                   |           |
| C(9)-N(2)-C(16)     | 110.1(6)  |                   |           |
| C(10)-N(2)-C(16)    | 108.1(6)  |                   |           |
| C(9)-N(2)-Re(1)     | 108.8(5)  |                   |           |
| C(10)-N(2)-Re(1)    | 106.5(5)  |                   |           |
| C(16)-N(2)-Re(1)    | 112.3(5)  |                   |           |
| C(20)-C(21)-C(22)   | 120.2(13) |                   |           |
| C(20)-C(21)-H(21)   | 119.9     |                   |           |
| C(22)-C(21)-H(21)   | 119.9     |                   |           |
| N(1)-C(8)-C(7)      | 119.7(9)  |                   |           |
| N(1)-C(8)-C(9)      | 117.1(7)  |                   |           |
| C(7)-C(8)-C(9)      | 123.1(8)  |                   |           |
| C(38)-C(39)-C(40)   | 118.2(9)  |                   |           |
| C(38)-C(39)-H(39)   | 120.9     |                   |           |
| C(40)-C(39)-H(39)   | 120.9     |                   |           |
| C(23)-C(24)-C(25)   | 121.8(14) |                   |           |
| C(23)-C(24)-H(24)   | 119.1     |                   |           |
| C(25)-C(24)-H(24)   | 119.1     |                   |           |
| C(13)-C(14)-C(15)   | 119.8(11) |                   |           |
| C(13)-C(14)-H(14)   | 120.1     |                   |           |
| C(15)-C(14)-H(14)   | 120.1     |                   |           |
| C(23)-C(22)-C(21)   | 120.2(14) |                   |           |
| C(23)-C(22)-H(22)   | 119.9     |                   |           |
| C(21)-C(22)-H(22)   | 119.9     |                   |           |

**Table 7.** Crystal data and structure refinement for 7.

|                                   |                                                                                                                                              |
|-----------------------------------|----------------------------------------------------------------------------------------------------------------------------------------------|
| Formula                           | [Re(C <sub>24</sub> H <sub>21</sub> F <sub>3</sub> N <sub>8</sub> O <sub>3</sub> )(CO) <sub>3</sub> ][Cl]                                    |
| Formula weight                    | 832.17 gmol <sup>-1</sup>                                                                                                                    |
| Temperature                       | 293(2) K                                                                                                                                     |
| Wavelength                        | 0.71073 Å                                                                                                                                    |
| Crystal system                    | monoclinic                                                                                                                                   |
| Space group                       | <i>C</i> 2/ <i>c</i>                                                                                                                         |
| Unit cell dimensions              | <i>a</i> = 31.824(4) Å<br><i>b</i> = 11.2317(12) Å<br><i>c</i> = 16.0096(17) Å<br>$\alpha$ = 90°.<br>$\beta$ = 90.604(5)°.<br>$\gamma$ = 90° |
| Volume                            | 5722.1(11) Å <sup>3</sup>                                                                                                                    |
| <i>Z</i>                          | 8                                                                                                                                            |
| Density (calculated)              | 1.932 Mg/m <sup>3</sup>                                                                                                                      |
| Absorption coefficient            | 4.419 mm <sup>-1</sup>                                                                                                                       |
| F(000)                            | 3248                                                                                                                                         |
| Crystal size                      | 0.10 × 0.05 × 0.035 mm <sup>3</sup>                                                                                                          |
| Theta range for data collection   | 2.31 to 25.00°.                                                                                                                              |
| Index ranges                      | -37 ≤ <i>h</i> ≤ 37, -13 ≤ <i>k</i> ≤ 13, -18 ≤ <i>l</i> ≤ 18                                                                                |
| Reflections collected             | 17938                                                                                                                                        |
| Independent reflections           | 5011 [R(int) = 0.1160]                                                                                                                       |
| Completeness to theta = 25.00°    | 99.3 %                                                                                                                                       |
| Refinement method                 | Full-matrix least-squares on F <sup>2</sup>                                                                                                  |
| Data / restraints / parameters    | 5011 / 0 / 415                                                                                                                               |
| Goodness-of-fit on F <sup>2</sup> | 0.923                                                                                                                                        |
| Final R indices [I > 2σ(I)]       | <i>R</i> <sub>1</sub> = 0.0435, <i>wR</i> <sub>2</sub> = 0.0704                                                                              |
| R indices (all data)              | <i>R</i> <sub>1</sub> = 0.0935, <i>wR</i> <sub>2</sub> = 0.0806                                                                              |
| Largest diff. peak and hole       | 1.332 and -0.797 eÅ <sup>-3</sup>                                                                                                            |

**Table 8.** Bond lengths [Å] and angles [°] for 7.

|              |           |                   |           |
|--------------|-----------|-------------------|-----------|
| Re(1)-C(2)   | 1.900(7)  | C(19)-H(19A)      | 0.9700    |
| Re(1)-C(1)   | 1.921(8)  | C(19)-H(19B)      | 0.9700    |
| Re(1)-C(3)   | 1.922(8)  | C(9)-H(9A)        | 0.9700    |
| Re(1)-N(1)   | 2.171(6)  | C(9)-H(9B)        | 0.9700    |
| Re(1)-N(3)   | 2.174(5)  | C(13)-C(14)       | 1.372(9)  |
| Re(1)-N(2)   | 2.222(5)  | C(13)-C(12)       | 1.382(10) |
| F(1)-C(27)   | 1.347(9)  | C(13)-H(13)       | 0.9300    |
| C(3)-O(3)    | 1.150(7)  | C(25)-C(26)       | 1.397(9)  |
| N(3)-C(11)   | 1.346(7)  | C(25)-C(27)       | 1.518(11) |
| N(3)-C(15)   | 1.348(8)  | C(5)-H(5)         | 0.9300    |
| N(2)-C(10)   | 1.491(8)  | C(26)-H(26)       | 0.9300    |
| N(2)-C(9)    | 1.514(8)  | C(15)-C(14)       | 1.367(9)  |
| N(2)-C(16)   | 1.519(8)  | C(15)-H(15)       | 0.9300    |
| C(2)-O(2)    | 1.161(7)  | C(12)-H(12)       | 0.9300    |
| N(1)-C(4)    | 1.356(8)  | C(10)-H(10A)      | 0.9700    |
| N(1)-C(8)    | 1.371(8)  | C(10)-H(10B)      | 0.9700    |
| N(5)-N(4)    | 1.331(7)  | C(23)-H(23)       | 0.9300    |
| N(5)-N(6)    | 1.337(7)  | C(14)-H(14)       | 0.9300    |
| O(4)-C(20)   | 1.218(8)  |                   |           |
| N(4)-C(17)   | 1.351(8)  | C(2)-Re(1)-C(1)   | 88.4(3)   |
| C(11)-C(12)  | 1.377(9)  | C(2)-Re(1)-C(3)   | 89.4(3)   |
| C(11)-C(10)  | 1.484(9)  | C(1)-Re(1)-C(3)   | 89.9(3)   |
| C(7)-C(6)    | 1.365(9)  | C(2)-Re(1)-N(1)   | 93.9(3)   |
| C(7)-C(8)    | 1.374(10) | C(1)-Re(1)-N(1)   | 172.0(2)  |
| C(7)-H(7)    | 0.9300    | C(3)-Re(1)-N(1)   | 97.8(3)   |
| F(3)-C(27)   | 1.312(9)  | C(2)-Re(1)-N(3)   | 97.6(2)   |
| O(1)-C(1)    | 1.145(8)  | C(1)-Re(1)-N(3)   | 91.0(2)   |
| O(6)-N(8)    | 1.222(7)  | C(3)-Re(1)-N(3)   | 172.9(2)  |
| C(6)-C(5)    | 1.359(9)  | N(1)-Re(1)-N(3)   | 81.05(19) |
| C(6)-H(6)    | 0.9300    | C(2)-Re(1)-N(2)   | 171.3(3)  |
| C(22)-C(23)  | 1.378(9)  | C(1)-Re(1)-N(2)   | 98.6(2)   |
| C(22)-C(21)  | 1.389(9)  | C(3)-Re(1)-N(2)   | 95.8(2)   |
| C(22)-H(22)  | 0.9300    | N(1)-Re(1)-N(2)   | 78.51(18) |
| C(21)-C(26)  | 1.383(9)  | N(3)-Re(1)-N(2)   | 77.08(19) |
| C(21)-N(7)   | 1.421(8)  | O(3)-C(3)-Re(1)   | 177.9(7)  |
| C(17)-C(18)  | 1.384(9)  | C(11)-N(3)-C(15)  | 118.8(6)  |
| C(17)-C(16)  | 1.494(9)  | C(11)-N(3)-Re(1)  | 115.8(4)  |
| C(16)-H(16A) | 0.9700    | C(15)-N(3)-Re(1)  | 125.4(4)  |
| C(16)-H(16B) | 0.9700    | C(10)-N(2)-C(9)   | 109.8(5)  |
| C(8)-C(9)    | 1.497(9)  | C(10)-N(2)-C(16)  | 109.1(5)  |
| C(24)-C(23)  | 1.369(9)  | C(9)-N(2)-C(16)   | 104.0(5)  |
| C(24)-C(25)  | 1.391(10) | C(10)-N(2)-Re(1)  | 107.0(4)  |
| C(24)-N(8)   | 1.454(9)  | C(9)-N(2)-Re(1)   | 109.9(3)  |
| C(4)-C(5)    | 1.364(10) | C(16)-N(2)-Re(1)  | 116.9(4)  |
| C(4)-H(4)    | 0.9300    | O(2)-C(2)-Re(1)   | 178.7(6)  |
| N(7)-C(20)   | 1.345(9)  | C(4)-N(1)-C(8)    | 116.8(6)  |
| N(7)-H(7A)   | 0.8600    | C(4)-N(1)-Re(1)   | 125.7(5)  |
| O(5)-N(8)    | 1.219(8)  | C(8)-N(1)-Re(1)   | 117.3(4)  |
| C(18)-N(6)   | 1.331(8)  | N(4)-N(5)-N(6)    | 107.0(6)  |
| C(18)-H(18)  | 0.9300    | N(5)-N(4)-C(17)   | 108.7(5)  |
| F(2)-C(27)   | 1.334(9)  | N(3)-C(11)-C(12)  | 120.9(6)  |
| C(19)-N(6)   | 1.448(8)  | N(3)-C(11)-C(10)  | 115.9(5)  |
| C(19)-C(20)  | 1.517(9)  | C(12)-C(11)-C(10) | 123.1(5)  |

|                     |          |                     |          |
|---------------------|----------|---------------------|----------|
| C(6)-C(7)-C(8)      | 118.4(7) | H(9A)-C(9)-H(9B)    | 107.5    |
| C(6)-C(7)-H(7)      | 120.8    | N(5)-N(6)-C(18)     | 111.4(6) |
| C(8)-C(7)-H(7)      | 120.8    | N(5)-N(6)-C(19)     | 119.8(6) |
| C(5)-C(6)-C(7)      | 120.9(7) | C(18)-N(6)-C(19)    | 128.7(6) |
| C(5)-C(6)-H(6)      | 119.6    | O(4)-C(20)-N(7)     | 124.3(6) |
| C(7)-C(6)-H(6)      | 119.6    | O(4)-C(20)-C(19)    | 122.6(7) |
| C(23)-C(22)-C(21)   | 119.5(7) | N(7)-C(20)-C(19)    | 113.1(6) |
| C(23)-C(22)-H(22)   | 120.2    | C(14)-C(13)-C(12)   | 119.1(7) |
| C(21)-C(22)-H(22)   | 120.2    | C(14)-C(13)-H(13)   | 120.4    |
| C(26)-C(21)-C(22)   | 120.5(6) | C(12)-C(13)-H(13)   | 120.4    |
| C(26)-C(21)-N(7)    | 122.8(7) | C(24)-C(25)-C(26)   | 119.9(6) |
| C(22)-C(21)-N(7)    | 116.6(6) | C(24)-C(25)-C(27)   | 123.0(7) |
| N(4)-C(17)-C(18)    | 108.0(6) | C(26)-C(25)-C(27)   | 117.0(7) |
| N(4)-C(17)-C(16)    | 124.1(6) | C(6)-C(5)-C(4)      | 118.6(7) |
| C(18)-C(17)-C(16)   | 127.7(6) | C(6)-C(5)-H(5)      | 120.7    |
| C(17)-C(16)-N(2)    | 116.1(6) | C(4)-C(5)-H(5)      | 120.7    |
| C(17)-C(16)-H(16A)  | 108.3    | C(21)-C(26)-C(25)   | 119.2(7) |
| N(2)-C(16)-H(16A)   | 108.3    | C(21)-C(26)-H(26)   | 120.4    |
| C(17)-C(16)-H(16B)  | 108.3    | C(25)-C(26)-H(26)   | 120.4    |
| N(2)-C(16)-H(16B)   | 108.3    | O(6)-N(8)-O(5)      | 123.7(7) |
| H(16A)-C(16)-H(16B) | 107.4    | O(6)-N(8)-C(24)     | 117.9(7) |
| N(1)-C(8)-C(7)      | 122.2(6) | O(5)-N(8)-C(24)     | 118.0(7) |
| N(1)-C(8)-C(9)      | 116.0(6) | N(3)-C(15)-C(14)    | 122.7(6) |
| C(7)-C(8)-C(9)      | 121.7(6) | N(3)-C(15)-H(15)    | 118.7    |
| O(1)-C(1)-Re(1)     | 174.2(6) | C(14)-C(15)-H(15)   | 118.7    |
| C(23)-C(24)-C(25)   | 120.0(7) | C(11)-C(12)-C(13)   | 119.7(7) |
| C(23)-C(24)-N(8)    | 117.3(7) | C(11)-C(12)-H(12)   | 120.1    |
| C(25)-C(24)-N(8)    | 122.6(7) | C(13)-C(12)-H(12)   | 120.1    |
| N(1)-C(4)-C(5)      | 123.0(7) | C(11)-C(10)-N(2)    | 112.4(5) |
| N(1)-C(4)-H(4)      | 118.5    | C(11)-C(10)-H(10A)  | 109.1    |
| C(5)-C(4)-H(4)      | 118.5    | N(2)-C(10)-H(10A)   | 109.1    |
| C(20)-N(7)-C(21)    | 128.5(6) | C(11)-C(10)-H(10B)  | 109.1    |
| C(20)-N(7)-H(7A)    | 115.7    | N(2)-C(10)-H(10B)   | 109.1    |
| C(21)-N(7)-H(7A)    | 115.7    | H(10A)-C(10)-H(10B) | 107.9    |
| N(6)-C(18)-C(17)    | 105.0(6) | C(24)-C(23)-C(22)   | 120.8(7) |
| N(6)-C(18)-H(18)    | 127.5    | C(24)-C(23)-H(23)   | 119.6    |
| C(17)-C(18)-H(18)   | 127.5    | C(22)-C(23)-H(23)   | 119.6    |
| N(6)-C(19)-C(20)    | 111.8(6) | F(3)-C(27)-F(2)     | 109.2(7) |
| N(6)-C(19)-H(19A)   | 109.2    | F(3)-C(27)-F(1)     | 106.1(7) |
| C(20)-C(19)-H(19A)  | 109.2    | F(2)-C(27)-F(1)     | 105.1(7) |
| N(6)-C(19)-H(19B)   | 109.2    | F(3)-C(27)-C(25)    | 113.6(7) |
| C(20)-C(19)-H(19B)  | 109.2    | F(2)-C(27)-C(25)    | 111.9(7) |
| H(19A)-C(19)-H(19B) | 107.9    | F(1)-C(27)-C(25)    | 110.3(7) |
| C(8)-C(9)-N(2)      | 115.3(5) | C(15)-C(14)-C(13)   | 118.7(7) |
| C(8)-C(9)-H(9A)     | 108.4    | C(15)-C(14)-H(14)   | 120.6    |
| N(2)-C(9)-H(9A)     | 108.4    | C(13)-C(14)-H(14)   | 120.6    |
| C(8)-C(9)-H(9B)     | 108.4    |                     |          |
| N(2)-C(9)-H(9B)     | 108.4    |                     |          |

## References

1. C. P. Casey, M. W. Meszaros, S. M. Neumann, I. G. Cesa and K. J. Haller, *Organometallics*, 1985, 4, 143-149.
2. S. Huang, R. J. Clark and L. Zhu, *Org. Lett.*, 2007, 9, 4999-5002.
3. M. M. Sa, M. D. Ramos and L. Fernandes, *Tetrahedron*, 2006, 62, 11652-11656.
4. H. Hope, *Progress in Inorganic Chemistry, Vol 41*, 1994, 41, 1-19.
5. SMART., 2001.
6. SAINTPlus., 2003/2004.
7. SADABS., 2004.
8. SHELXTL., 2004.
